# Supplementary material for: Effects of Anticoccidial Vaccination and Taraxacum officinale Extract on the Growth Performance, Biochemical Parameters, Immunity, and Intestinal Morphology of Eimeria-Challenged Chickens
Source: MDPI journal article supplement (doi:10.3390/life13091927), 2023-09-17
Supplement: s1 [file s1]

Supplementary Material

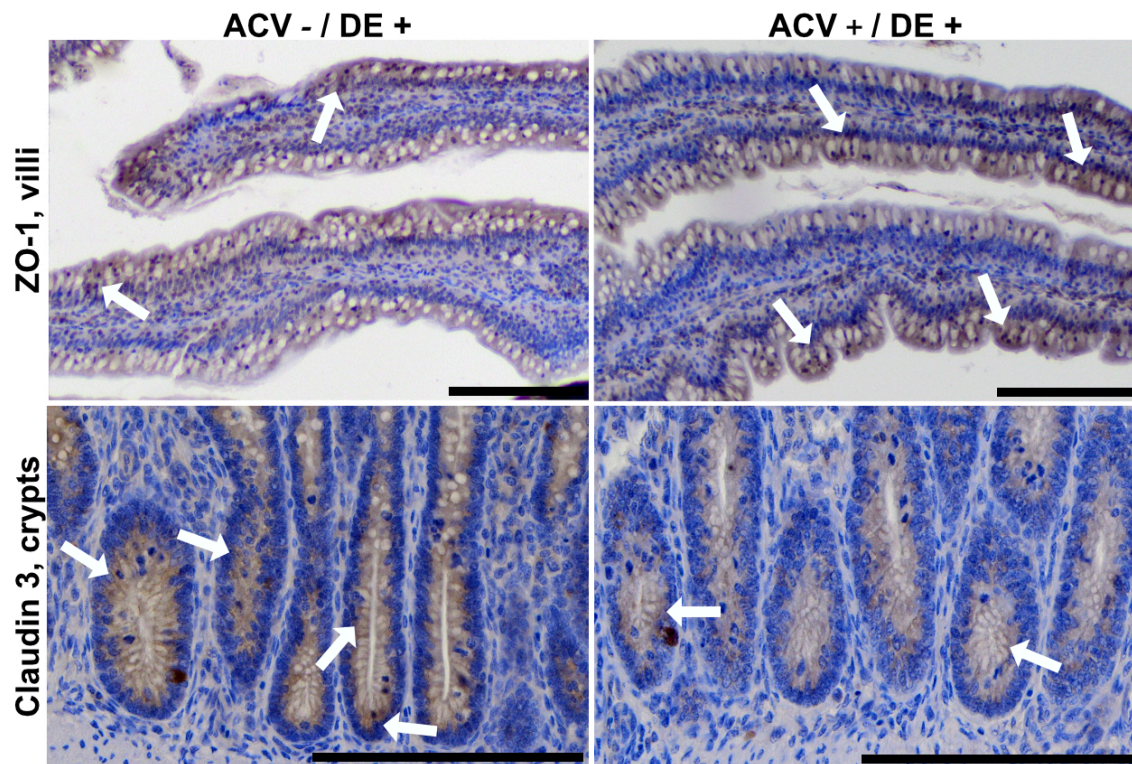

**Figure S1.** Representative images of the immunohistochemical reactions of zonula occludens-1 and claudin -3 carried out on formaldehyde-fixed sections from the jejunum of broiler chickens sampled at 5 d post challenging with *Eimeria* spp.; ACV—vaccination at 1 d of age with anticoccidial vaccine and DE—dietary supplementation with *Taraxacum officinale* (dandelion) extract. Examples of the reaction are marked with white arrows. All the scale bars represent 100  $\mu$ m.
